# Supplementary material for: Linkages between straw decomposition rate and the change in microbial fractions and extracellular enzyme activities in soils under different long-term fertilization treatments
Source: PubMed Central journal article supplement (PMC6135362; doi:10.1371/journal.pone.0202660), 2018-09-12
Supplement: pone.0202660.s004.pdf [file pone.0202660.s004.pdf]

Table 1. Soil CO<sub>2</sub> emission rate (ug C g<sup>-1</sup>soil h<sup>-1</sup>).

| Treatment | 1day | 2d   | 3d   | 5d   | 7d   | 10d  | 14d  | 21d  | 28d  | 35d  | 45d  | 60d  | 75d  |
|-----------|------|------|------|------|------|------|------|------|------|------|------|------|------|
| CK        | 0.20 | 0.24 | 0.13 | 0.10 | 0.01 | 0.01 | 0.01 | 0.01 | 0.03 | 0.01 | 0.00 | 0.00 | 0.01 |
| NPK       | 0.25 | 0.30 | 0.24 | 0.16 | 0.04 | 0.00 | 0.00 | 0.03 | 0.06 | 0.02 | 0.04 | 0.03 | 0.02 |
| NPKS      | 0.29 | 0.33 | 0.24 | 0.28 | 0.13 | 0.13 | 0.12 | 0.13 | 0.10 | 0.08 | 0.07 | 0.07 | 0.04 |
| CK+S      | 1.00 | 1.61 | 1.71 | 1.49 | 0.58 | 0.55 | 0.50 | 0.37 | 0.18 | 0.17 | 0.05 | 0.09 | 0.03 |
| NPK+S     | 1.13 | 1.85 | 1.76 | 1.61 | 0.72 | 0.61 | 0.60 | 0.48 | 0.43 | 0.25 | 0.12 | 0.15 | 0.06 |
| NPKS+S    | 1.17 | 1.88 | 2.18 | 2.14 | 1.03 | 0.81 | 0.75 | 0.52 | 0.47 | 0.29 | 0.14 | 0.20 | 0.07 |

Table 2. Soil total PLFA (nmol g<sup>-1</sup> soil).

| Treatment | 1day | 3day | 7day | 28day | 75day |
|-----------|------|------|------|-------|-------|
| CK        | 14.4 | 15.3 | 14.0 | 19.7  | 15.2  |
| NPK       | 20.9 | 21.5 | 23.0 | 24.3  | 16.7  |
| NPKS      | 25.5 | 26.6 | 25.8 | 28.8  | 22.1  |
| CK+S      | 17.8 | 18.2 | 27.1 | 29.3  | 21.1  |
| NPK+S     | 23.5 | 28.4 | 36.8 | 35.6  | 21.4  |
| NPKS+S    | 37.2 | 39.0 | 53.5 | 44.1  | 30.2  |

Table 3. Soil total bacteria (nmol g<sup>-1</sup> soil).

| Treatment | 1day | 3day | 7day | 28day | 75day |
|-----------|------|------|------|-------|-------|
| CK        | 6.5  | 6.9  | 6.3  | 8.2   | 6.8   |
| NPK       | 10.0 | 9.9  | 10.9 | 11.3  | 7.6   |
| NPKS      | 12.2 | 12.2 | 11.8 | 13.2  | 10.0  |
| CK+S      | 8.0  | 8.2  | 12.4 | 13.4  | 9.5   |
| NPK+S     | 10.9 | 13.2 | 17.1 | 16.6  | 11.0  |
| NPKS+S    | 17.3 | 19.2 | 25.2 | 20.2  | 13.7  |

Table 4. Soil total fungi (nmol g<sup>-1</sup> soil).

| Treatment | 1day | 3day | 7day | 28day | 75day |
|-----------|------|------|------|-------|-------|
| CK        | 1.31 | 1.37 | 1.25 | 1.53  | 1.33  |
| NPK       | 1.93 | 2.05 | 2.01 | 2.13  | 1.48  |
| NPKS      | 2.44 | 2.59 | 2.32 | 2.61  | 2.15  |
| CK+S      | 2.50 | 2.44 | 3.48 | 3.33  | 2.29  |
| NPK+S     | 2.92 | 3.52 | 4.52 | 3.62  | 2.44  |
| NPKS+S    | 4.49 | 4.85 | 6.45 | 4.83  | 3.28  |

Table 5. Soil Actinomycetes (nmol g<sup>-1</sup> soil).

| Treatment | 1day | 3day | 7day | 28day | 75day |
|-----------|------|------|------|-------|-------|
| CK        | 1.76 | 1.88 | 1.79 | 2.39  | 2.01  |
| NPK       | 2.52 | 2.51 | 2.89 | 2.94  | 2.04  |
| NPKS      | 3.20 | 3.18 | 3.32 | 3.67  | 2.93  |
| CK+S      | 1.78 | 1.91 | 3.08 | 3.41  | 2.59  |
| NPK+S     | 2.55 | 3.04 | 3.82 | 4.04  | 2.87  |
| NPKS+S    | 3.99 | 4.64 | 6.17 | 5.20  | 3.68  |

Table 6. The percentage of soil bacteria to total PLFA (%).

| Treatment | 1day | 3day | 7day | 28day | 75day |
|-----------|------|------|------|-------|-------|
| CK        | 58.7 | 58.6 | 58.7 | 58.3  | 58.1  |
| NPK       | 61.0 | 60.9 | 61.1 | 59.9  | 59.2  |
| NPKS      | 60.7 | 60.5 | 60.9 | 59.4  | 58.7  |
| CK+S      | 59.5 | 59.5 | 60.3 | 58.7  | 58.3  |
| NPK+S     | 60.6 | 60.8 | 61.6 | 59.7  | 59.6  |
| NPKS+S    | 60.6 | 60.6 | 61.0 | 59.0  | 58.8  |

Table 7. The percentage of soil fungi to total PLFA (%).

| Treatment | 1day | 3day | 7day | 28day | 75day |
|-----------|------|------|------|-------|-------|
| CK        | 9.1  | 9.0  | 8.9  | 8.6   | 8.8   |
| NPK       | 9.2  | 9.4  | 8.8  | 8.8   | 8.9   |
| NPKS      | 9.5  | 9.7  | 9.5  | 9.4   | 9.6   |
| CK+S      | 13.2 | 12.9 | 12.8 | 11.3  | 10.9  |
| NPK+S     | 12.4 | 12.4 | 12.3 | 10.2  | 10.1  |
| NPKS+S    | 12.1 | 12.0 | 12.1 | 11.0  | 10.9  |

Table 8. The percentage of soil actinomycetes to total PLFA (%).

| Treatment | 1day | 3day | 7day | 28day | 75day |
|-----------|------|------|------|-------|-------|
| CK        | 12.2 | 12.3 | 12.8 | 13.2  | 13.2  |
| NPK       | 12.1 | 11.9 | 12.6 | 12.1  | 12.2  |
| NPKS      | 12.5 | 12.2 | 13.0 | 12.8  | 13.2  |
| CK+S      | 10.0 | 10.2 | 11.1 | 11.6  | 12.3  |
| NPK+S     | 10.8 | 10.7 | 10.6 | 11.3  | 11.9  |
| NPKS+S    | 10.7 | 11.3 | 11.5 | 11.8  | 12.2  |

Table 9. BG activity (nmol g<sup>-1</sup>soil h<sup>-1</sup>)

| Treatment | 1day  | 3day  | 7day  | 28day | 75day |
|-----------|-------|-------|-------|-------|-------|
| CK        | 107.8 | 100.1 | 77.5  | 71.6  | 79.6  |
| NPK       | 175.9 | 153.8 | 141.5 | 101.8 | 128.2 |
| NPKS      | 273.6 | 259.5 | 222.1 | 142.7 | 160.2 |
| CK+S      | 155.0 | 192.2 | 176.7 | 131.2 | 130.7 |
| NPK+S     | 235.7 | 296.0 | 193.8 | 155.7 | 176.5 |
| NPKS+S    | 425.0 | 444.5 | 256.4 | 181.2 | 197.5 |

Table 10. CB activity (nmol g<sup>-1</sup>soil h<sup>-1</sup>)

| Treatment | 1day  | 3day  | 7day  | 28day | 75day |
|-----------|-------|-------|-------|-------|-------|
| CK        | 21.1  | 20.9  | 19.1  | 15.0  | 13.1  |
| NPK       | 48.9  | 45.9  | 41.9  | 25.4  | 26.1  |
| NPKS      | 62.3  | 58.2  | 61.9  | 39.8  | 39.1  |
| CK+S      | 32.5  | 38.0  | 40.4  | 41.2  | 28.6  |
| NPK+S     | 75.9  | 85.9  | 88.3  | 46.5  | 37.3  |
| NPKS+S    | 118.6 | 123.7 | 108.6 | 65.2  | 54.2  |

Table 11. XYL activity (nmol g<sup>-1</sup>soil h<sup>-1</sup>)

| Treatment | 1day  | 3day  | 7day  | 28day | 75day |
|-----------|-------|-------|-------|-------|-------|
| CK        | 44.3  | 39.5  | 41.5  | 31.7  | 25.8  |
| NPK       | 63.4  | 53.4  | 62.2  | 45.3  | 37.6  |
| NPKS      | 92.0  | 76.0  | 81.1  | 75.4  | 64.9  |
| CK+S      | 63.6  | 90.1  | 107.1 | 75.4  | 55.4  |
| NPK+S     | 106.6 | 142.4 | 133.2 | 82.0  | 70.3  |
| NPKS+S    | 147.6 | 154.1 | 147.3 | 107.6 | 100.1 |

Table12.NAG activity (nmol g<sup>-1</sup>soil h<sup>-1</sup>)

| Treatment | 1day | 3day | 7day | 28day | 75day |
|-----------|------|------|------|-------|-------|
| CK        | 9.2  | 6.4  | 8.8  | 3.9   | 6.5   |
| NPK       | 14.3 | 11.5 | 13.8 | 8.6   | 10.4  |
| NPKS      | 19.4 | 19.2 | 16.7 | 14.8  | 15.0  |
| CK+S      | 11.2 | 9.5  | 16.7 | 14.1  | 15.1  |
| NPK+S     | 17.3 | 16.2 | 24.5 | 15.0  | 19.5  |
| NPKS+S    | 21.3 | 21.6 | 29.9 | 20.9  | 24.3  |

Table 13. POX activity (nmol g<sup>-1</sup>soil h<sup>-1</sup>)

| Treatment | 1day | 3day | 7day | 28day | 75day |
|-----------|------|------|------|-------|-------|
| CK        | 0.72 | 0.73 | 0.75 | 0.77  | 0.80  |
| NPK       | 0.59 | 0.61 | 0.63 | 0.65  | 0.61  |
| NPKS      | 0.59 | 0.60 | 0.62 | 0.64  | 0.62  |
| CK+S      | 0.74 | 0.74 | 0.78 | 0.82  | 0.85  |
| NPK+S     | 0.62 | 0.68 | 0.66 | 0.75  | 0.82  |
| NPKS+S    | 0.63 | 0.64 | 0.63 | 0.70  | 0.77  |

| Treatment | Day   | 14:00 | 15:1 G | 16:1 ω 5c | 17:1<br>B/iso I | 17:1 ω 8c | 16:1 20H | 18:00 |
|-----------|-------|-------|--------|-----------|-----------------|-----------|----------|-------|
| CK        | 1--1  | 0.94  | 0.85   | 3.98      | 3.15            | 0.94      | 2.55     | 3.45  |
| NPK       | 1--2  | 0.93  | 0.93   | 3.44      | 2.36            | 0.98      | 1.96     | 2.87  |
| NPKS      | 1--3  | 0.95  | 0.88   | 3.54      | 2.36            | 0.98      | 1.95     | 2.90  |
| CK+S      | 1--4  | 1.12  | 0.62   | 3.16      | 2.53            | 1.14      | 1.80     | 3.05  |
| NPK+S     | 1--5  | 0.88  | 0.54   | 2.80      | 2.14            | 1.09      | 1.48     | 2.98  |
| NPKS+S    | 1--6  | 1.01  | 0.77   | 3.11      | 1.81            | 1.09      | 1.60     | 2.90  |
| CK        | 3--1  | 1.28  | 1.08   | 1.33      | 0.89            | 2.45      | 3.59     | 1.52  |
| NPK       | 3--2  | 0.82  | 0.83   | 1.12      | 0.88            | 1.75      | 3.57     | 1.24  |
| NPKS      | 3--3  | 0.99  | 0.79   | 1.16      | 0.93            | 1.78      | 3.04     | 1.27  |
| CK+S      | 3--4  | 1.03  | 0.80   | 1.02      | 0.92            | 1.64      | 3.36     | 0.91  |
| NPK+S     | 3--5  | 0.96  | 0.80   | 1.05      | 1.00            | 1.55      | 3.00     | 1.16  |
| NPKS+S    | 3--6  | 1.06  | 0.76   | 0.96      | 1.03            | 1.54      | 2.87     | 1.10  |
| CK        | 7--1  | 0.90  | 1.06   | 1.27      | 0.83            | 2.57      | 3.28     | 1.03  |
| NPK       | 7--2  | 0.76  | 0.69   | 1.15      | 0.87            | 2.49      | 3.19     | 1.25  |
| NPKS      | 7--3  | 0.82  | 0.40   | 0.96      | 0.79            | 2.26      | 3.36     | 1.07  |
| CK+S      | 7--4  | 0.95  | 0.49   | 0.86      | 0.89            | 1.91      | 3.38     | 0.94  |
| NPK+S     | 7--5  | 0.95  | 0.88   | 0.93      | 0.88            | 1.69      | 3.03     | 0.69  |
| NPKS+S    | 7--6  | 0.89  | 0.59   | 0.93      | 0.89            | 1.61      | 2.82     | 1.05  |
| CK        | 28--1 | 1.23  | 0.90   | 1.29      | 3.03            | 0.79      | 3.20     | 1.05  |
| NPK       | 28--2 | 1.10  | 0.92   | 1.35      | 2.57            | 0.84      | 3.44     | 1.36  |
| NPKS      | 28--3 | 0.99  | 0.63   | 1.31      | 2.44            | 0.83      | 3.24     | 1.28  |
| CK+S      | 28--4 | 1.06  | 0.76   | 1.04      | 2.35            | 0.84      | 3.28     | 1.10  |
| NPK+S     | 28--5 | 0.99  | 0.75   | 1.16      | 2.23            | 0.86      | 2.95     | 1.23  |
| NPKS+S    | 28--6 | 0.94  | 0.67   | 1.01      | 2.17            | 0.90      | 3.15     | 1.28  |
| CK        | 75--1 | 0.94  | 0.91   | 1.00      | 0.86            | 2.68      | 3.78     | 1.13  |
| NPK       | 75--2 | 0.88  | 1.11   | 1.26      | 0.91            | 2.16      | 3.47     | 1.15  |
| NPKS      | 75--3 | 0.71  | 0.75   | 1.15      | 0.85            | 1.93      | 3.35     | 1.67  |
| CK+S      | 75--4 | 0.91  | 0.74   | 1.10      | 0.77            | 1.67      | 3.20     | 1.19  |
| NPK+S     | 75--5 | 1.00  | 0.46   | 1.05      | 0.74            | 1.74      | 3.87     | 1.23  |
| NPKS+S    | 75--6 | 1.08  | 0.78   | 1.05      | 0.85            | 1.55      | 3.17     | 1.37  |

| 18:1 $\omega$ 7c<br>11-<br>methyl | 20:00 | 16:00 | 17:00 | i14:0 | i15:0 | i16:0 | i17:0 | a15:0 | a17:0 |
|-----------------------------------|-------|-------|-------|-------|-------|-------|-------|-------|-------|
| 1.12                              | 0.47  | 13.76 | 0.70  | 0.32  | 6.16  | 2.86  | 2.33  | 2.67  | 2.30  |
| 1.15                              | 0.60  | 13.76 | 0.66  | 0.49  | 6.35  | 3.16  | 2.21  | 2.96  | 2.12  |
| 1.16                              | 0.59  | 13.21 | 0.69  | 0.46  | 6.37  | 3.32  | 2.25  | 3.02  | 2.14  |
| 0.84                              | 0.57  | 14.89 | 0.74  | 0.32  | 6.06  | 3.06  | 2.03  | 2.71  | 1.91  |
| 0.98                              | 0.63  | 14.83 | 0.76  | 0.41  | 5.93  | 3.08  | 1.99  | 2.94  | 1.94  |
| 0.96                              | 0.67  | 14.67 | 0.77  | 0.57  | 6.32  | 3.16  | 2.01  | 3.18  | 1.96  |
| 0.48                              | 2.62  | 15.74 | 0.75  | 0.39  | 5.98  | 2.90  | 2.35  | 2.50  | 2.28  |
| 0.73                              | 3.61  | 14.41 | 0.73  | 0.36  | 6.42  | 3.00  | 2.32  | 2.68  | 2.16  |
| 0.74                              | 3.24  | 14.06 | 0.78  | 0.43  | 6.28  | 3.63  | 2.23  | 2.86  | 2.10  |
| 0.78                              | 2.80  | 16.32 | 0.78  | 0.36  | 5.94  | 2.80  | 2.01  | 3.20  | 1.98  |
| 0.92                              | 2.83  | 14.76 | 0.76  | 0.39  | 5.94  | 2.93  | 2.09  | 3.02  | 2.00  |
| 0.76                              | 3.15  | 14.40 | 0.76  | 0.50  | 6.34  | 3.28  | 2.12  | 3.16  | 2.06  |
| 0.51                              | 4.07  | 14.29 | 0.63  | 0.36  | 6.54  | 3.06  | 2.53  | 2.74  | 2.33  |
| 0.27                              | 2.82  | 14.17 | 0.70  | 0.38  | 6.32  | 2.93  | 2.76  | 2.95  | 2.53  |
| 0.32                              | 2.92  | 14.29 | 0.76  | 0.33  | 6.47  | 3.59  | 2.22  | 2.96  | 2.57  |
| 0.56                              | 2.80  | 15.10 | 0.79  | 0.39  | 6.66  | 3.46  | 2.50  | 2.95  | 2.28  |
| 0.55                              | 2.84  | 15.69 | 0.84  | 0.41  | 6.49  | 3.46  | 2.45  | 3.28  | 2.35  |
| 0.49                              | 2.87  | 14.47 | 0.82  | 0.56  | 6.93  | 3.78  | 2.34  | 3.43  | 2.29  |
| 0.58                              | 3.83  | 14.09 | 0.73  | 0.41  | 6.37  | 2.98  | 2.65  | 2.76  | 2.38  |
| 0.71                              | 3.40  | 13.91 | 0.73  | 0.43  | 6.29  | 2.86  | 2.45  | 2.89  | 2.24  |
| 0.63                              | 3.67  | 13.93 | 0.72  | 0.46  | 6.20  | 3.03  | 2.51  | 2.92  | 2.28  |
| 0.84                              | 4.08  | 13.62 | 0.70  | 0.45  | 7.08  | 2.92  | 2.63  | 2.99  | 2.22  |
| 0.82                              | 4.61  | 13.78 | 0.76  | 0.50  | 6.93  | 2.94  | 2.54  | 3.12  | 2.12  |
| 0.73                              | 4.26  | 13.61 | 0.79  | 0.49  | 6.65  | 3.17  | 2.48  | 3.04  | 2.15  |
| 0.70                              | 3.69  | 14.21 | 0.74  | 0.23  | 5.30  | 2.75  | 2.71  | 2.29  | 2.42  |
| 0.82                              | 3.32  | 14.43 | 0.71  | 0.25  | 5.08  | 2.51  | 2.51  | 2.40  | 2.30  |
| 0.79                              | 2.74  | 13.97 | 0.77  | 0.30  | 4.90  | 2.69  | 2.41  | 2.31  | 2.14  |
| 1.02                              | 4.50  | 13.50 | 0.72  | 0.36  | 6.59  | 2.51  | 2.57  | 2.86  | 2.17  |
| 0.86                              | 4.35  | 14.35 | 0.79  | 0.45  | 6.22  | 2.86  | 2.62  | 2.86  | 2.28  |
| 0.75                              | 4.18  | 14.05 | 0.71  | 0.48  | 6.37  | 2.74  | 2.52  | 2.89  | 2.00  |

| 16:1 $\omega$ |                  |        |        | 18:2 $\omega$ |                  |          |          |          |
|---------------|------------------|--------|--------|---------------|------------------|----------|----------|----------|
| 7c/16:1       | 18:1 $\omega$ 7c | cy17:0 | cy19:0 | 6,9c/18:      | 18:1 $\omega$ 9c | 10Me16:0 | 10Me17:0 | 10Me18:0 |
| $\omega$ 6c   |                  |        |        | 0 ante        |                  |          |          |          |
| 5.63          | 13.19            | 2.27   | 8.35   | 2.13          | 7.28             | 9.31     | 0.63     | 2.67     |
| 6.24          | 13.69            | 2.62   | 8.56   | 2.55          | 6.98             | 9.35     | 0.74     | 2.33     |
| 5.92          | 13.48            | 2.56   | 8.69   | 2.13          | 7.63             | 9.47     | 0.81     | 2.54     |
| 6.08          | 14.94            | 2.06   | 6.30   | 5.01          | 8.75             | 7.54     | 0.58     | 2.19     |
| 6.05          | 15.16            | 2.18   | 7.22   | 4.71          | 8.10             | 8.11     | 0.75     | 2.33     |
| 6.11          | 14.43            | 2.23   | 7.16   | 4.14          | 8.31             | 8.19     | 0.71     | 2.18     |
| 5.21          | 13.12            | 2.52   | 8.46   | 2.10          | 7.41             | 9.55     | 0.76     | 2.72     |
| 5.88          | 13.76            | 2.61   | 9.02   | 2.63          | 7.13             | 9.44     | 0.65     | 2.24     |
| 5.65          | 13.75            | 2.60   | 8.83   | 2.54          | 7.62             | 9.60     | 0.83     | 2.28     |
| 5.84          | 14.81            | 2.27   | 6.20   | 5.34          | 8.21             | 7.89     | 0.57     | 2.24     |
| 6.35          | 15.00            | 2.42   | 7.19   | 5.07          | 7.74             | 8.16     | 0.76     | 2.15     |
| 5.97          | 14.41            | 2.41   | 7.36   | 4.27          | 7.99             | 8.44     | 0.75     | 2.53     |
| 5.12          | 13.10            | 2.56   | 8.43   | 2.09          | 7.31             | 9.97     | 0.64     | 2.80     |
| 4.82          | 12.25            | 3.22   | 11.03  | 2.50          | 6.77             | 9.61     | 0.79     | 2.78     |
| 4.65          | 12.38            | 3.01   | 10.38  | 2.77          | 7.20             | 9.72     | 0.86     | 2.95     |
| 5.02          | 13.21            | 2.77   | 7.10   | 5.81          | 7.44             | 8.11     | 0.77     | 2.84     |
| 5.27          | 12.73            | 2.89   | 7.96   | 5.98          | 6.75             | 8.02     | 0.98     | 2.01     |
| 5.55          | 12.66            | 2.68   | 7.85   | 5.25          | 7.27             | 8.36     | 0.99     | 2.63     |
| 4.74          | 12.45            | 2.54   | 9.09   | 2.09          | 6.96             | 10.48    | 0.60     | 2.75     |
| 5.39          | 13.01            | 2.69   | 9.66   | 2.15          | 6.98             | 9.92     | 0.77     | 1.93     |
| 5.16          | 12.47            | 2.89   | 9.31   | 2.40          | 7.42             | 9.93     | 0.81     | 2.55     |
| 5.15          | 13.40            | 2.77   | 6.93   | 4.49          | 7.27             | 9.01     | 0.72     | 2.30     |
| 5.74          | 13.25            | 2.70   | 7.68   | 3.63          | 6.93             | 8.91     | 0.90     | 1.95     |
| 5.33          | 13.36            | 2.67   | 7.52   | 3.98          | 7.40             | 8.88     | 0.97     | 2.41     |
| 4.43          | 13.74            | 2.69   | 9.61   | 1.93          | 7.32             | 10.35    | 0.66     | 2.92     |
| 5.03          | 13.90            | 2.82   | 10.42  | 2.23          | 7.27             | 10.21    | 0.73     | 2.13     |
| 5.05          | 13.94            | 2.76   | 10.60  | 3.12          | 7.15             | 10.46    | 0.73     | 2.78     |
| 4.77          | 13.97            | 2.84   | 7.86   | 3.97          | 7.38             | 9.87     | 0.58     | 2.38     |
| 5.01          | 13.18            | 2.64   | 8.58   | 3.08          | 7.40             | 9.32     | 0.74     | 2.30     |
| 5.10          | 12.93            | 2.62   | 8.85   | 3.52          | 7.77             | 9.38     | 1.00     | 2.27     |
